# Supplementary material for: Surface Plasmon Resonance-Based Immunosensor for Igm Detection with Gold Nanoparticles
Source: MDPI journal article supplement (doi:10.3390/mi12091092), 2021-09-10
Supplement: s1 [file s1]

# Supplementary Materials: Surface Plasmon Resonance-Based Immunosensor For IgM Detection With Gold Nanoparticles

Nilay Bereli <sup>1</sup>, Monireh Bakhshpour <sup>1</sup>, Aykut Arif Topcu <sup>2</sup> and Adil Denizli <sup>1,\*</sup>

<sup>1</sup> Chemistry Department, Hacettepe University, Beytepe, 06800, Ankara, Turkey; bereli@hacettepe.edu.tr (N.B.); monir.b1985@gmail.com (M.B.)

<sup>2</sup> Medical Laboratory Program, Vocational School of Health Service, Aksaray University, 68100, Aksaray, Turkey; aykutttopcu@aksaray.edu.tr

\* Correspondence: denizli@hacettepe.edu.tr; Tel.: +90-31-297-7983; Fax: +90-312-299-2163

The effect of pH on IgM detection using the I-SPR sensor was examined in the range of pH 4.0-8.0 (Figure S1). The sensing surface was equilibrated with the desired pH buffer solutions after that 100 ng/mL IgM solution was interacted with I-SPR sensor.

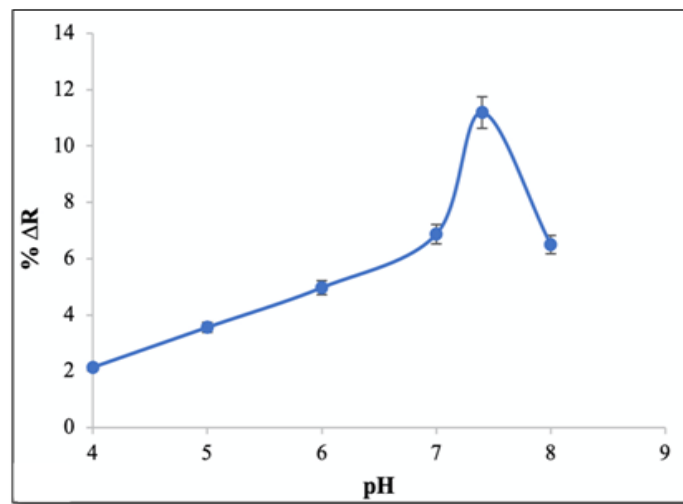

**Figure S1.** The effects of pH on the detection of IgM using I-SPR sensor (flow rate: 150  $\mu$ L/min, 100 ng/mL IgM solution and T: 25  $^{\circ}$ C).

Adsorption isotherm models can be used to understand the adsorption behavior during the adsorption process, thereby, the Langmuir, the Freundlich and the Langmuir-Freundlich adsorption isotherm models were investigated to understand the binding event manners of IgM. The Langmuir adsorption model is a homogenous adsorption model and defines the occurrence of adsorption on a monolayer surface with equal binding sites, whereas the Freundlich adsorption model defines a heterogeneous adsorption on a heterogeneous surface. The Langmuir-Freundlich adsorption model is generally used to understand the adsorption behavior of molecular imprinting studies and is a useful model over the high concentrations. Hence, we used 3 adsorption isotherm models and the Langmuir, the Freundlich and the Langmuir-Freundlich models were calculated with Eqs. (1), (2), and (3), respectively.

$$\Delta R = [\Delta R_{\max} (C) / K_D + (C)] \quad \text{Eq (1)}$$

$$\Delta R = [\Delta R_{\max} (C)^{1/n}] \quad \text{Eq (2)}$$

$$\Delta R = [\Delta R_{\max} (C)^{1/n} / K_D + (C)^{1/n}] \quad \text{Eq (3)}$$

Herein, C; IgM concentration (ng/mL),  $\Delta R_{\max}$ ; the sensor response,  $K_D$ ; equilibrium dissociation constant and  $1/n$ ; the Freundlich exponent.

According to experimental results (Table S1), the binding manners of IgM and I-SPR obeyed the Langmuir adsorption model with a monolayer surface and equal binding sites with a high  $R^2$  (0.99) value.

Langmuir model with  $\Delta R_{\max}$  equals 12.5 is found to be the most appropriate modal to identify the interaction between IgM molecules and I-SPR sensor.

**Table S1.** The results of the Langmuir, the Freundlich and the Langmuir-Freundlich adsorption isotherm models.

| Langmuir          |       | Freundlich        |      | Langmuir- Freundlich |       |
|-------------------|-------|-------------------|------|----------------------|-------|
| $\Delta R_{\max}$ | 12.5  | $\Delta R_{\max}$ | 4.15 | $\Delta R_{\max}$    | 19.26 |
| $K_A$ , ng/mL     | 0.033 | 1/n               | 0.54 | $K_A$ , ng/mL        | 0.028 |
| $K_D$ , mL/ng     | 30.01 | $R^2$             | 0.85 | $K_D$ , mL/ng        | 35.37 |
| $R^2$             | 0.99  |                   |      | $R^2$                | 0.94  |
